# Supplementary material
Source: PubMed Central journal article supplement (PMC7084146)
Supplement: pnas.1918473117.sapp.pdf [file pnas.1918473117.sapp.pdf]

1 **Supporting information**

2

3 **Materials and Methods**

4

5 **Dye-filling assay**

6 The dye-filling protocol was adapted from previously described methods (1). One day old adult  
7 animals were stained with DiI (Molecular Probes) with final concentration of 10  $\mu\text{g/ml}$  for 2-4  
8 hours. The nematodes were washed twice with M9 and mounted on 3% agarose pad for imaging.

9 The nematodes were analyzed with Nomarski optics and fluorescence microscopy, using a  
10 ZEISS AxioImager Z1 microscope coupled to CoolSNAP HQ2 camera (Photometric).

11 Multidimensional data were reconstructed as maximum intensity projections using Zeiss Zen  
12 software.

13 **Laser ablation**

14 Laser microsurgery was conducted as described previously (2). Briefly, L2 larvae of animal  
15 which expressing GFP in specific neurons were mounted on 3% agarose plate with 7 mM  
16 sodium azide, and two photon lasers (Chameleon-Ultra 750nm, Coherent Inc.) were used to  
17 photobleach the cell body of target neurons (ZEISS LSM 510 META-NLO). After surgery, the  
18 animals were recovered on NGM plates and after two days, neuronal loss was confirmed by  
19 checking the absence of GFP signal. The animals were subsequently picked to *P. ostreatus*  
20 culture and scored for paralysis after 10 minutes of fungal exposure.

21 **Intracellular ROS staining**

22 To stain intracellular ROS accumulation level in nematodes after they exposed to *P. ostreatus*,  
23 aldicarb (1.5 mM), levamisole (1 mM), ivermectin (10  $\mu\text{M}$ ) and nicotine (20 mM), the paralyzed  
24 nematodes were incubated in the M9 with H<sub>2</sub>DCFDA (100  $\mu\text{M}$ , D399 Invitrogen) for one hour at

25 room temperature. The nematodes were imaged by a spinning disk confocal microscopy which  
26 was described above in the neuronal necrosis assay.

27

## 28 Synthesis of *trans*-dec-2-ene-1,10-dioic acid

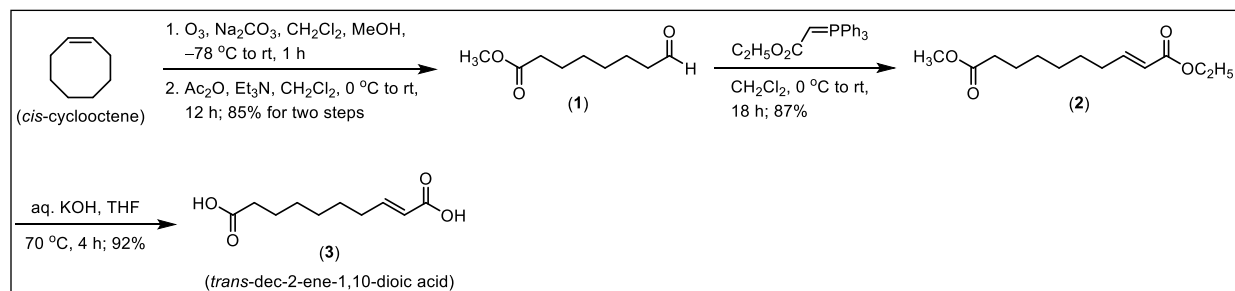

29

30

### 31 Methyl 8-oxooctanoate (1)

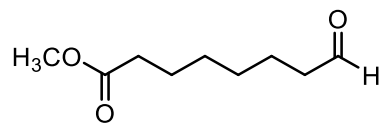

32

33 Ozone was bubbled into a mixture of *cis*-cyclooctene (3.90 mL, 30.00 mmol) and  $\text{Na}_2\text{CO}_3$  (0.82

34 g, 7.74 mmol) in  $\text{CH}_2\text{Cl}_2$  (90 mL) and methanol (18 mL) at  $-78\text{ }^\circ\text{C}$  until a faint blue color

35 appeared. Air was then bubbled into the reaction mixture until the blue color was discharged.

36 The cooling bath was removed and the resulting mixture slowly warmed to room temperature.

37 After filtration, toluene (50 mL) was added and the mixture concentrated to ~20 mL with the

38 resulting viscous liquid being diluted with  $\text{CH}_2\text{Cl}_2$  (80 mL). After cooling to  $0\text{ }^\circ\text{C}$ ,  $\text{Et}_3\text{N}$  (6.2 mL,

39 44.48 mmol) and acetic anhydride (7.90 mL, 83.57 mmol) were sequentially added dropwise and

40 the mixture was stirred at  $0\text{ }^\circ\text{C}$  for 30 min and then was warmed to room temperature. After

41 stirring for 12 h at room temperature, the reaction mixture was washed with 0.1 N aqueous  $\text{HCl}$

42 ( $2 \times 60\text{ mL}$ ), 10% aqueous  $\text{NaOH}$  ( $2 \times 60\text{ mL}$ ), water (60 mL), and dried over  $\text{MgSO}_4$ . The

43 solution was filtered and concentrated in vacuo to give a crude oil, which was purified by

44 column chromatography on silica gel (20% EtOAc in hexane) to afford the desired product 1  
45 (4.38 g, 85% for two steps). C<sub>9</sub>H<sub>16</sub>O<sub>3</sub>, colorless oil; TLC (EtOAc/hexane, 1:3) *R<sub>f</sub>* = 0.31; <sup>1</sup>H  
46 NMR (400 MHz, CDCl<sub>3</sub>) δ 9.72 (1 H, t, *J* = 1.6 Hz), 3.63 (3 H, s), 2.39 (2 H, ddd, *J* = 9.2, 5.6,  
47 1.6 Hz), 2.27 (2 H, t, *J* = 7.6 Hz), 1.61–1.59 (4 H, m), 1.33–1.29 (4 H, m); <sup>13</sup>C NMR (100 MHz,  
48 CDCl<sub>3</sub>) δ 202.5, 174.0, 51.4, 43.7, 33.9, 28.7, 28.7, 24.6, 21.8; HRMS calcd for C<sub>9</sub>H<sub>17</sub>O<sub>3</sub>:  
49 173.1178, [ESI] found *m/z*: 173.1179 [M + H]<sup>+</sup>.

50

51 1-Ethyl 10-methyl (*E*)-dec-2-enedioate (2)

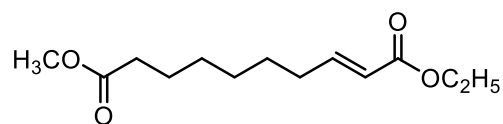

53 To a cooled (0 °C) solution of (carbethoxymethylene)triphenylphosphorane (351 mg, 1 mmol) in  
54 anhydrous CH<sub>2</sub>Cl<sub>2</sub> (10 mL) was added a solution of compound 1 (173 mg, 1 mmol) in anhydrous  
55 CH<sub>2</sub>Cl<sub>2</sub> (3 mL). After stirring for 30 min at 0 °C, the reaction mixture was warmed to room  
56 temperature and then stirred for 18 h. The solvent was removed and the residual oil was purified  
57 by column chromatography on silica gel (10% EtOAc in hexane) to afford the desired product 2  
58 (210 mg, 87%). C<sub>13</sub>H<sub>22</sub>O<sub>4</sub>, colorless liquid; TLC (EtOAc/hexane, 1:4) *R<sub>f</sub>* = 0.30; <sup>1</sup>H NMR (400  
59 MHz, CDCl<sub>3</sub>) δ 6.92 (1 H, dt, *J* = 15.6, 6.9 Hz), 5.78 (1 H, d, *J* = 15.6 Hz), 4.15 (2 H, q, *J* = 7.2  
60 Hz), 3.64 (3 H, s), 2.27 (2 H, t, *J* = 7.5 Hz), 2.19–2.14 (2 H, m), 1.63–1.56 (2 H, m), 1.47–1.40  
61 (2 H, m), 1.32–1.30 (4 H, m), 1.26 (3 H, t, *J* = 7.2 Hz); <sup>13</sup>C NMR (100 MHz, CDCl<sub>3</sub>) δ 173.9,  
62 166.4, 148.9, 121.2, 59.9, 51.2, 33.7, 31.8, 28.6, 28.5, 27.6, 24.6, 14.0; HRMS calcd for  
63 C<sub>13</sub>H<sub>23</sub>O<sub>4</sub>: 243.1596, [ESI] found *m/z*: 243.1596 [M + H]<sup>+</sup>.

64

65 *trans*-Dec-2-ene-1,10-dioic acid (3)

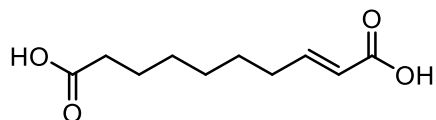

66  
67 A solution of compound 2 (200 mg, 0.82 mmol) in ethanol (5 mL) was added 2 N aqueous KOH  
68 (3 mL). The reaction mixture was heated to 70 °C and then stirred for 4 h at the same  
69 temperature. The reaction solution was concentrated to give the residual liquid, which was  
70 diluted with diethyl ether (10 mL) and then acidified by conc. HCl to pH 2. The resulting  
71 solution was extracted with diethyl ether (5 × 30 mL), and the combined organic extracts were  
72 dried over MgSO<sub>4</sub>, filtered and concentrated to afford the desired product 3 (151 mg, 92%).  
73 C<sub>10</sub>H<sub>16</sub>O<sub>4</sub>, white solid, mp 166–168 °C; <sup>1</sup>H NMR (500 MHz, CD<sub>3</sub>OD) δ 6.95 (1 H, dt, *J* = 15.5,  
74 7.0 Hz), 5.79 (1 H, d, *J* = 15.5 Hz), 2.28 (2 H, t, *J* = 7.0 Hz), 2.24–2.20 (2 H, m), 1.62–1.59 (2 H,  
75 m), 1.49–1.47 (2 H, m), 1.38–1.36 (4 H, m); <sup>13</sup>C NMR (125 MHz, CD<sub>3</sub>OD) δ 177.7, 170.2,  
76 151.1, 122.6, 34.9, 33.1, 30.0, 29.9, 29.1, 26.0; HRMS calcd for C<sub>10</sub>H<sub>16</sub>NO<sub>4</sub>: 200.2340, [EI]  
77 found *m/z*: 200.2339 [M<sup>+</sup>].

78

79

80 **Figures**

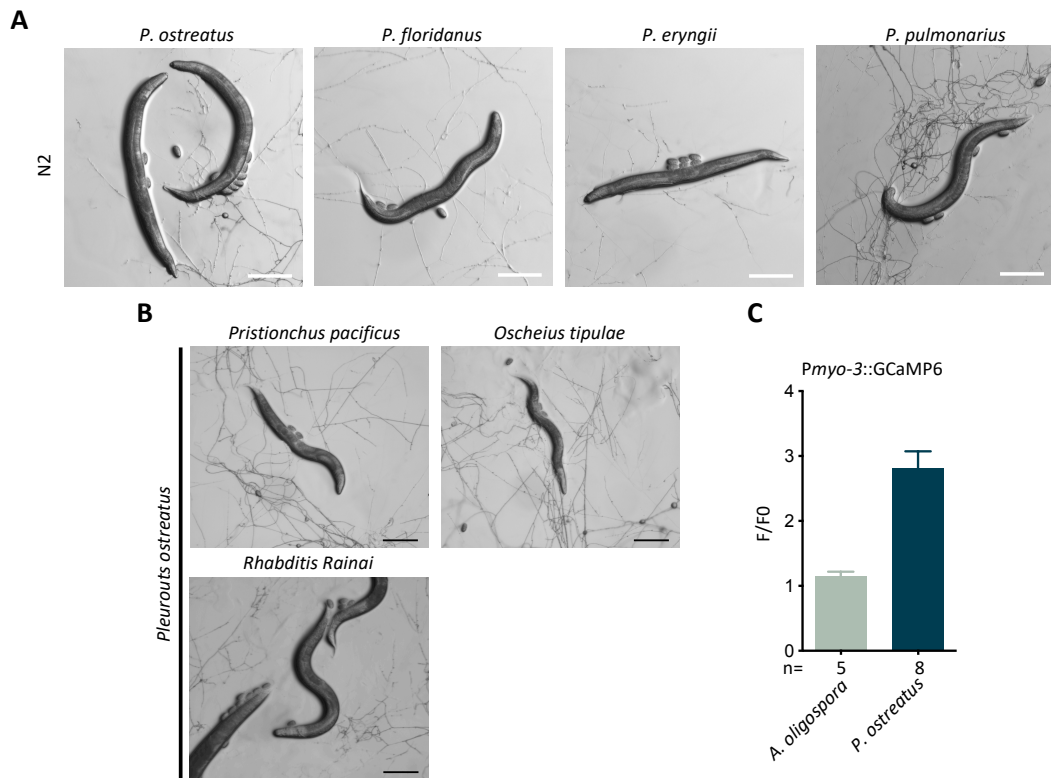

81 **Fig. S1.** (A) Wild-type *C. elegans* (N2) on *Pleurotus* hyphae. Scale bar = 200  $\mu$ m. (B)  
 82 *Pristionchus pacificus*, *Oscheius tipulae* and *Rhabditis Rainai* on *P. ostreatus* hyphae. Scale bar  
 83 = 200  $\mu$ m. (C) GCaMP6 signals in the head muscle cells of *C. elegans* in response to *P. ostreatus*  
 84 or *A. oligospora* hyphae (mean  $\pm$  SD, n shown along x-axis).  
 85  
 86

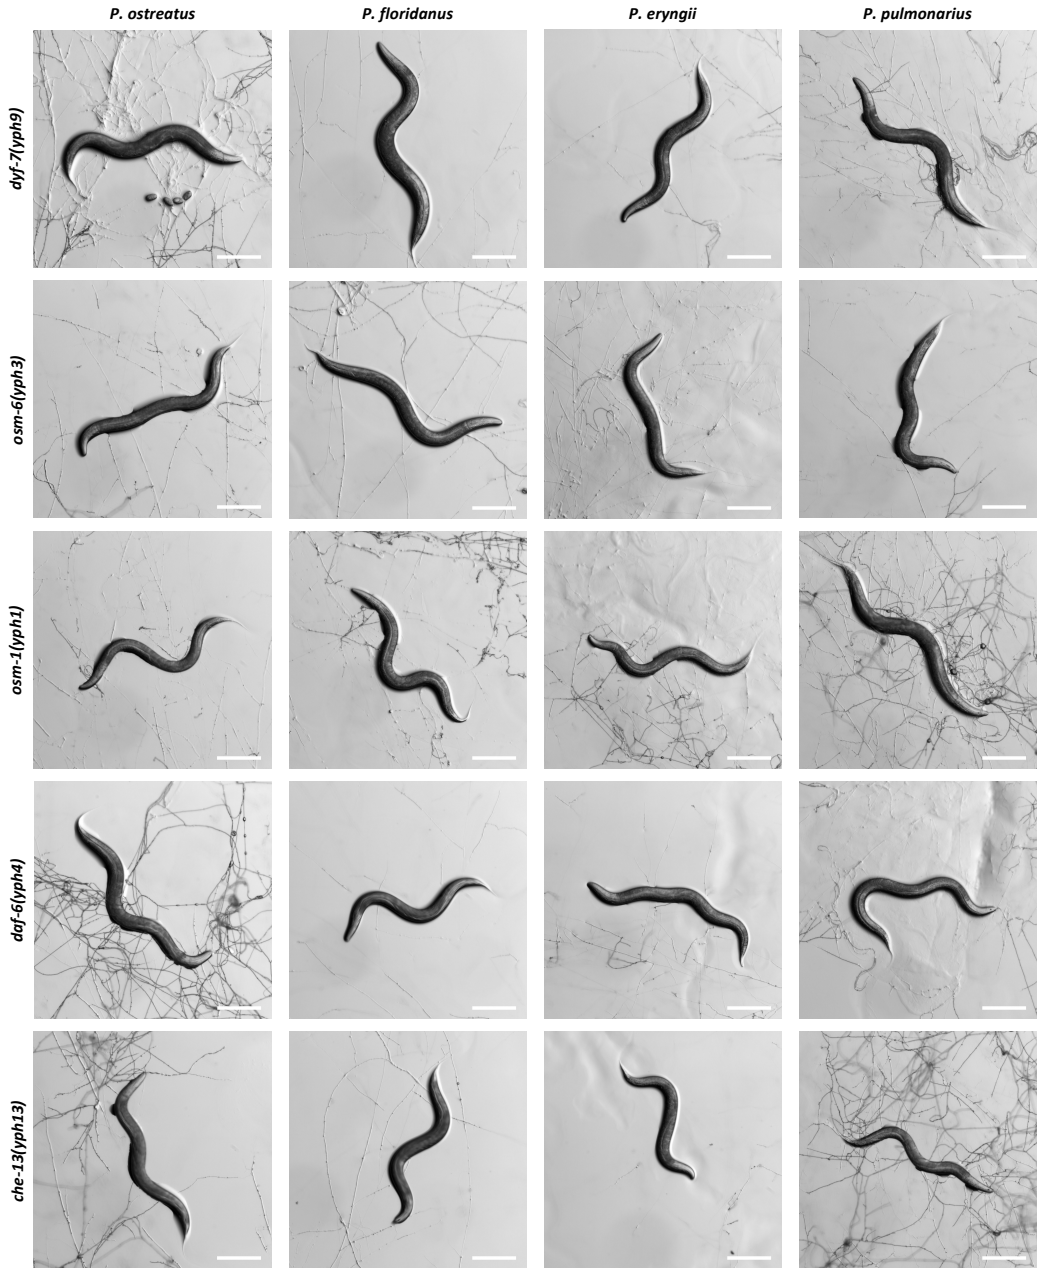

87  
88  
89  
90

**Fig. S2.** *P. ostreatus* -resistant mutants on hyphae of four other *Pleurotus* species. Scale bar = 200  $\mu$ m.

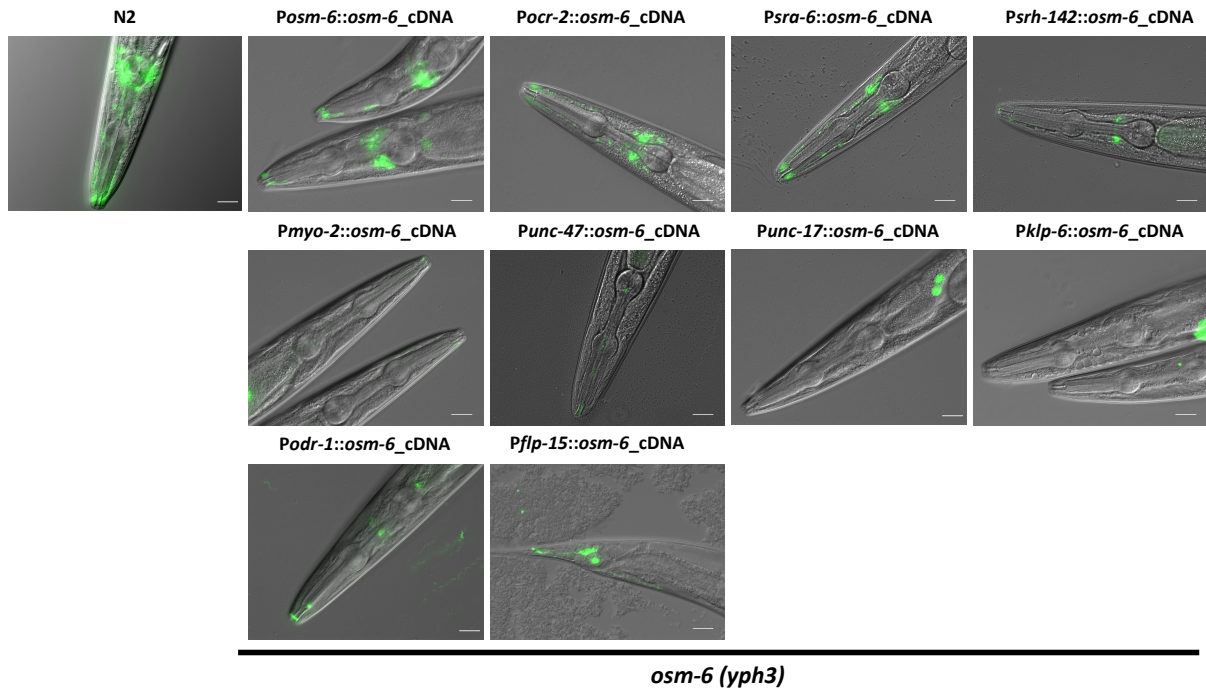

91  
 92 **Fig. S3.** Images of DiI staining of N2 and the *osm-6 (yph3)* mutant expressing wild-type *osm-6*  
 93 cDNA under various promoters. Scale bar = 20  $\mu$ m.  
 94

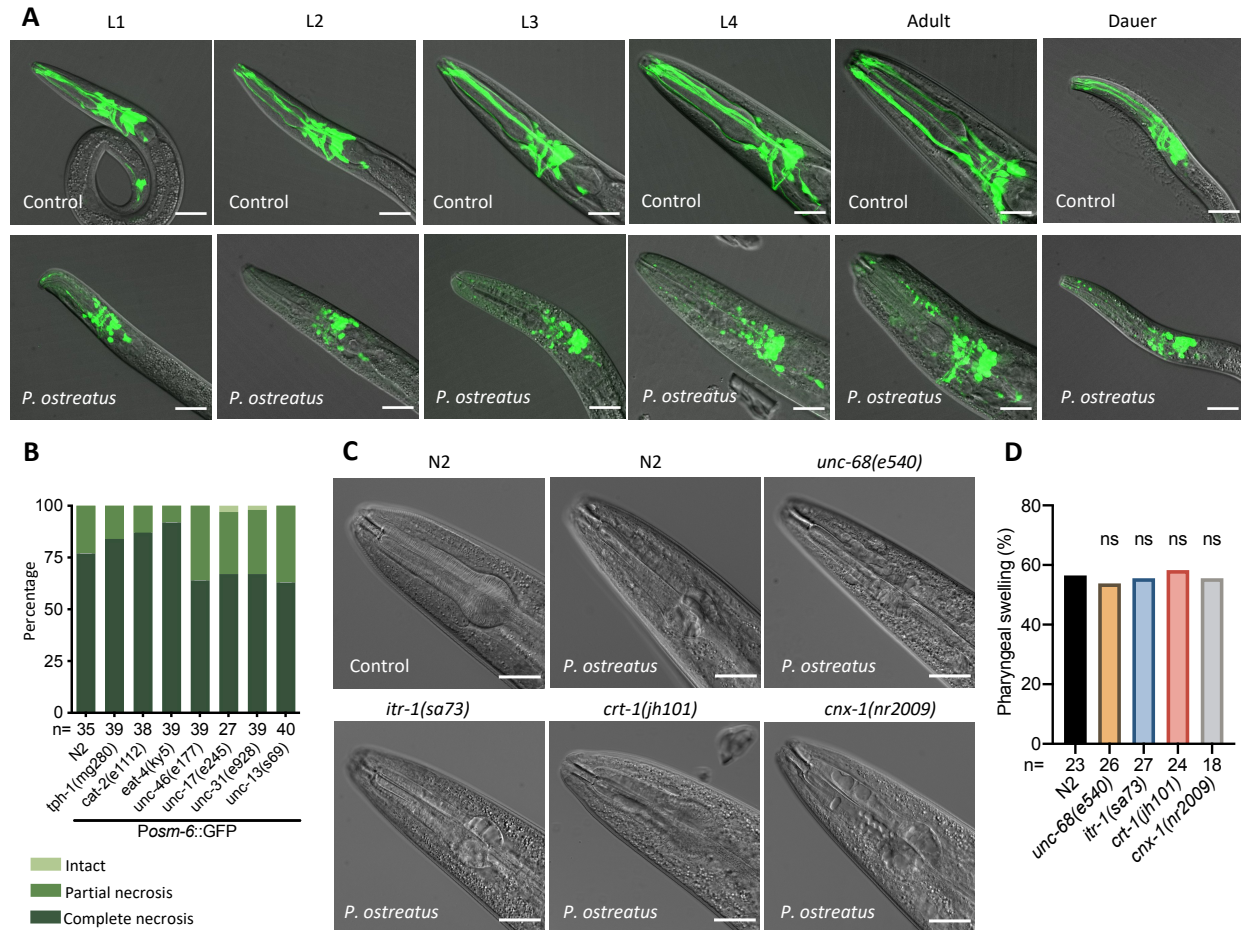

95  
 96 **Fig. S4.** (A) Images of cell necrosis in ciliated sensory neurons (*Posm-6::GFP*) in different  
 97 developmental stages of *C. elegans* wild-type (N2). Scale bar = 20  $\mu$ m. (B) Quantification of  
 98 necrosis of ciliated sensory neuron (*Posm-6::GFP*) in neurotransmitter mutants. (C) Differential  
 99 interference contrast images of the pharyngeal corpus in N2 and mutants that exposed to *P.*  
 100 *ostreatus*. Scale bar = 20  $\mu$ m. (D) Quantification of pharyngeal corpus swelling in N2 and  
 101 mutants upon contact with *P. ostreatus* hyphae.  
 102



103 **Movie S1.** *C. elegans* contacts the hyphae of *P. ostreatus*.

104

105 **Movie S2.** Calcium imaging of the pharyngeal muscles

106

107 **Movie S3.** Calcium imaging of the body wall muscles

108

109 **Movie S4.** The *osm-6 (yph3)* mutant contacts the hyphae of *P. ostreatus*.

110

111 **Movie S5.** Calcium imaging of the IL2 neurons.

112

113 **Movie S6.** Cell necrosis in the ciliated sensory neurons (*Posm-6::GFP*).

114

115 **Movie S7.** *P. pacificus* and the *osm-1 (tul129)* mutant contact the hyphae of *P. ostreatus*.

116

117 **Strain list:**

| Identifier | Species                       | Genotype             | Source     |
|------------|-------------------------------|----------------------|------------|
| N2         | <i>Caenorhabditis elegans</i> | wild type            | CGC        |
| CB4856     | <i>Caenorhabditis elegans</i> | wild type (Hawaiian) | CGC        |
| TWN135     | <i>Caenorhabditis elegans</i> | <i>dyf-7(yph9)</i>   | This study |
| TWN112     | <i>Caenorhabditis elegans</i> | <i>daf-6(yph4)</i>   | This study |
| TWN116     | <i>Caenorhabditis elegans</i> | <i>osm-6(yph5)</i>   | This study |
| TWN111     | <i>Caenorhabditis elegans</i> | <i>osm-6(yph3)</i>   | This study |
| TWN172     | <i>Caenorhabditis elegans</i> | <i>osm-1(yph10)</i>  | This study |
| TWN109     | <i>Caenorhabditis elegans</i> | <i>osm-1(yph1)</i>   | This study |
| TWN183     | <i>Caenorhabditis elegans</i> | <i>osm-1(yph12)</i>  | This study |
| TWN195     | <i>Caenorhabditis elegans</i> | <i>osm-1(yph16)</i>  | This study |
| TWN184     | <i>Caenorhabditis elegans</i> | <i>che-13(yph13)</i> | This study |
| CB3330     | <i>Caenorhabditis elegans</i> | <i>che-11(e1810)</i> | CGC        |
| CB1387     | <i>Caenorhabditis elegans</i> | <i>daf-10(e1387)</i> | CGC        |
| PR813      | <i>Caenorhabditis elegans</i> | <i>osm-5(p813)</i>   | CGC        |

|               |                               |                                                           |            |
|---------------|-------------------------------|-----------------------------------------------------------|------------|
| CB1033        | <i>Caenorhabditis elegans</i> | <i>che-2(e1033)</i>                                       | CGC        |
| SP1234        | <i>Caenorhabditis elegans</i> | <i>dyf-2(m160)</i>                                        | CGC        |
| DR86          | <i>Caenorhabditis elegans</i> | <i>daf-19(m86)</i>                                        | CGC        |
| TWN1475       | <i>Caenorhabditis elegans</i> | <i>tax-2(ok3403)</i>                                      | CGC        |
| TWN1474       | <i>Caenorhabditis elegans</i> | <i>tax-4(ok3371)</i>                                      | CGC        |
| <u>CX10</u>   | <i>Caenorhabditis elegans</i> | <i>osm-9(ky10)</i>                                        | CGC        |
| PS4322        | <i>Caenorhabditis elegans</i> | <i>trp-1(ok323)</i>                                       | CGC        |
| CX2205        | <i>Caenorhabditis elegans</i> | <i>odr-3(n2150)</i>                                       | CGC        |
| NL335         | <i>Caenorhabditis elegans</i> | <i>gpa-3(pk35)</i>                                        | CGC        |
| <u>PT1194</u> | <i>Caenorhabditis elegans</i> | <i>klp-6(my8); him-5(e1490)</i>                           | CGC        |
| MT15434       | <i>Caenorhabditis elegans</i> | <i>tph-1(mg280)</i>                                       | CGC        |
| CB1112        | <i>Caenorhabditis elegans</i> | <i>cat-2(e1112)</i>                                       | CGC        |
| MT6308        | <i>Caenorhabditis elegans</i> | <i>eat-4(ky5)</i>                                         | CGC        |
| CB177         | <i>Caenorhabditis elegans</i> | <i>unc-46(e177)</i>                                       | CGC        |
| PS34          | <i>Caenorhabditis elegans</i> | <i>unc-17(e245)</i>                                       | CGC        |
| CB928         | <i>Caenorhabditis elegans</i> | <i>unc-31(e928)</i>                                       | CGC        |
| EG9631        | <i>Caenorhabditis elegans</i> | <i>unc-13(s69)</i>                                        | CGC        |
| MT1522        | <i>Caenorhabditis elegans</i> | <i>ced-3(n717)</i>                                        | CGC        |
| CB540         | <i>Caenorhabditis elegans</i> | <i>unc-68(e540)</i>                                       | CGC        |
| JT73          | <i>Caenorhabditis elegans</i> | <i>itr-1(sa73)</i>                                        | CGC        |
| NS2938        | <i>Caenorhabditis elegans</i> | <i>cnx-1(nr2009)</i>                                      | CGC        |
| KJ216         | <i>Caenorhabditis elegans</i> | <i>crt-1(jh101)</i>                                       | CGC        |
| TWN1916       | <i>Caenorhabditis elegans</i> | <i>yphIs4[Pmyo-3::GCaMP6s::unc-54 3'UTR; Pofm-1::RFP]</i> | This study |
| TWN1915       | <i>Caenorhabditis elegans</i> | <i>yphIs3[Pmyo-2::GCaMP6s::unc-54 3'UTR; Pofm-1::RFP]</i> | This study |

|         |                               |                                                                                                   |            |
|---------|-------------------------------|---------------------------------------------------------------------------------------------------|------------|
| TWN1350 | <i>Caenorhabditis elegans</i> | <i>dyf-7(yph9);</i><br><i>yphEx26[WRM0632aE04;</i><br><i>Pofm-1::RFP]</i>                         | This study |
| TWN1352 | <i>Caenorhabditis elegans</i> | <i>osm-1(yph1);</i><br><i>yphEx28[WRM0622aH04;</i><br><i>Pofm-1::RFP]</i>                         | This study |
| TWN1353 | <i>Caenorhabditis elegans</i> | <i>daf-6(yph4);</i><br><i>yphEx29[WRM0629aE09;</i><br><i>Pofm-1::RFP]</i>                         | This study |
| TWN1331 | <i>Caenorhabditis elegans</i> | <i>osm-6(yph3);</i><br><i>yphEx23[WRM0617dH10;</i><br><i>Pofm-1::RFP]</i>                         | This study |
| TWN2538 | <i>Caenorhabditis elegans</i> | <i>che-13(yph13);</i><br><i>yphEx203[WRM0625bc12;</i><br><i>Pofm-1::RFP]</i>                      | This study |
| TWN2379 | <i>Caenorhabditis elegans</i> | <i>osm-6(yph3); yphEx95[Posm-</i><br><i>6::osm-6 cDNA::unc-54 3'UTR;</i><br><i>Pofm-1::RFP]</i>   | This study |
| TWN2386 | <i>Caenorhabditis elegans</i> | <i>osm-6(yph3); yphEx102[Pmyo-</i><br><i>2::osm-6 cDNA::unc-54 3'UTR;</i><br><i>Pofm-1::RFP]</i>  | This study |
| TWN2395 | <i>Caenorhabditis elegans</i> | <i>osm-6(yph3); yphEx111[Punc-</i><br><i>17::osm-6 cDNA::unc-54</i><br><i>3'UTR; Pofm-1::RFP]</i> | This study |
| TWN2405 | <i>Caenorhabditis elegans</i> | <i>osm-6(yph3); yphEx121[Pklp-</i><br><i>6::osm-6 cDNA::unc-54 3'UTR;</i><br><i>Pofm-1::RFP]</i>  | This study |
| TWN2418 | <i>Caenorhabditis elegans</i> | <i>osm-6(yph3); yphEx134[Pocr-</i><br><i>2::osm-6 cDNA::unc-54 3'UTR;</i><br><i>Pofm-1::RFP]</i>  | This study |

|         |                               |                                                                                                             |            |
|---------|-------------------------------|-------------------------------------------------------------------------------------------------------------|------------|
| TWN2431 | <i>Caenorhabditis elegans</i> | <i>osm-6(yph3); yphEx147[Punc-47::osm-6 cDNA::unc-54 3'UTR; Pofm-1::RFP]</i>                                | This study |
| TWN2442 | <i>Caenorhabditis elegans</i> | <i>osm-6(yph3); yphEx151[Psra-6::osm-6 cDNA::unc-54 3'UTR; Pofm-1::RFP]</i>                                 | This study |
| TWN2448 | <i>Caenorhabditis elegans</i> | <i>osm-6(yph3); yphEx157[Psrh-142::osm-6 cDNA::unc-54 3'UTR; Pofm-1::RFP]</i>                               | This study |
| TWN2461 | <i>Caenorhabditis elegans</i> | <i>osm-6(yph3); yphEx170[Pflp-15::osm-6 cDNA::unc-54 3'UTR; Pofm-1::RFP]</i>                                | This study |
| TWN2765 | <i>Caenorhabditis elegans</i> | <i>osm-6(yph-3); yphEx248[Podr-1::osm-6 cDNA::unc-54 3'UTR; Pofm-1::RFP]</i>                                | This study |
| TWN2371 | <i>Caenorhabditis elegans</i> | <i>yphEx88[Pklp-6::GCaMP6s::unc-54 3'UTR; Pofm-1::RFP]</i>                                                  | This study |
| TWN2474 | <i>Caenorhabditis elegans</i> | <i>osm-6(yph-3); yphEx175[Pklp-6::GCaMP6s::unc-54 3'UTR; Pofm-1::RFP]</i>                                   | This study |
| TWN2480 | <i>Caenorhabditis elegans</i> | <i>osm-6(yph-3); yphEx181[Pklp-6::GCaMP6s::unc-54 3'UTR; Pklp-6::osm-6 cDNA::unc-54 3'UTR; Pofm-1::RFP]</i> | This study |
| TWN2473 | <i>Caenorhabditis elegans</i> | <i>yphEx174[Pklp-6::GFP::unc-54 3'UTR; Pofm-1::RFP]</i>                                                     | This study |
| PY1058  | <i>Caenorhabditis elegans</i> | <i>lin-15(n765); oyIs14[Psra-6::GFP + lin-15(+)]</i>                                                        | CGC        |
| TWN2638 | <i>Caenorhabditis elegans</i> | <i>osm-6(yph-3); yphEx233[Posm-6::osm-6 cDNA::unc-54 3'UTR;</i>                                             | This study |

|         |                               |                                                                                                           |                         |
|---------|-------------------------------|-----------------------------------------------------------------------------------------------------------|-------------------------|
|         |                               | <i>Posm-6::TeTx::mCherry; Pofm-1::RFP]</i>                                                                |                         |
| TWN2617 | <i>Caenorhabditis elegans</i> | <i>yphEx216[Posm-6::GFP::unc-54 3'UTR; Pofm-1::RFP]</i>                                                   | This study              |
| TWN2598 | <i>Caenorhabditis elegans</i> | <i>yphEx209[Podr-1::GFP::unc-54 3'UTR; Pofm-1::RFP]</i>                                                   | This study              |
| TWN2817 | <i>Caenorhabditis elegans</i> | <i>yphEx265[Punc-17::GFP::unc-54 3'UTR; Pofm-1::RFP]</i>                                                  | This study              |
| NC1687  | <i>Caenorhabditis elegans</i> | <i>wdIs52[PF49H12.4::GFP]</i>                                                                             | CGC                     |
| CLP1166 | <i>Caenorhabditis elegans</i> | <i>twNEx501[Pgcy-8::GFP; Pmec-3::GFP]</i>                                                                 | Dr. Chunliang Pan's lab |
| TWN2847 | <i>Caenorhabditis elegans</i> | <i>yphEx279[Pptr-10::GFP::unc-54 3'UTR; Pofm-1::RFP]</i>                                                  | This study              |
| TWN2644 | <i>Caenorhabditis elegans</i> | <i>osm-6(yph-3); yphEx239[Pklp-6::osm-6 cDNA::unc-54 3'UTR; Posm-6::GFP::unc-54 3'UTR; Pofm-1::RFP]</i>   | This study              |
| TWN2849 | <i>Caenorhabditis elegans</i> | <i>osm-6(yph-3); yphEx281[Psrh-142::osm-6 cDNA::unc-54 3'UTR; Posm-6::GFP::unc-54 3'UTR; Pofm-1::RFP]</i> | This study              |
| TWN2851 | <i>Caenorhabditis elegans</i> | <i>ced-3(n717); yphEx216[Posm-6::GFP::unc-54 3'UTR; Pofm-1::RFP]</i>                                      | This study              |
| TWN2815 | <i>Caenorhabditis elegans</i> | <i>unc-68(e540); yphEx216[Posm-6::GFP::unc-54 3'UTR; Pofm-1::RFP]</i>                                     | This study              |

|         |                               |                                                                         |            |
|---------|-------------------------------|-------------------------------------------------------------------------|------------|
| TWN2852 | <i>Caenorhabditis elegans</i> | <i>itr-1(sa73); yphEx216[Posm-6::GFP::unc-54 3'UTR; Pofm-1::RFP]</i>    | This study |
| TWN2853 | <i>Caenorhabditis elegans</i> | <i>cnx-1(nr2009); yphEx216[Posm-6::GFP::unc-54 3'UTR; Pofm-1::RFP]</i>  | This study |
| TWN2866 | <i>Caenorhabditis elegans</i> | <i>crt-1(jh101); yphEx216[Posm-6::GFP::unc-54 3'UTR; Pofm-1::RFP]</i>   | This study |
| TWN2861 | <i>Caenorhabditis elegans</i> | <i>dyf-7(yph9); yphEx216[Posm-6::GFP::unc-54 3'UTR; Pofm-1::RFP]</i>    | This study |
| TWN2862 | <i>Caenorhabditis elegans</i> | <i>che-13(yph13); yphEx216[Posm-6::GFP::unc-54 3'UTR; Pofm-1::RFP]</i>  | This study |
| TWN2648 | <i>Caenorhabditis elegans</i> | <i>osm-6(yph3); yphEx243[Posm-6::GFP::unc-54 3'UTR; Pofm-1::RFP]</i>    | This study |
| TWN2863 | <i>Caenorhabditis elegans</i> | <i>unc-68(e540); yphIs3[Pmyo-2::GCAMP6s::unc-54 3'UTR; Pofm-1::RFP]</i> | This study |
| TWN3006 | <i>Caenorhabditis elegans</i> | <i>tph-1(mg280); yphIs3[Pmyo-2::GCAMP6s::unc-54 3'UTR; Pofm-1::RFP]</i> | This study |
| TWN3010 | <i>Caenorhabditis elegans</i> | <i>cat-2(e1112); yphIs3[Pmyo-2::GCAMP6s::unc-54 3'UTR; Pofm-1::RFP]</i> | This study |
| TWN3014 | <i>Caenorhabditis elegans</i> | <i>eat-4(ky5); yphIs3[Pmyo-2::GCAMP6s::unc-54 3'UTR; Pofm-1::RFP]</i>   | This study |

|         |                                |                                                                                                         |            |
|---------|--------------------------------|---------------------------------------------------------------------------------------------------------|------------|
| TWN3017 | <i>Caenorhabditis elegans</i>  | <i>unc-46(e177); yphIs3[Pmyo-2::GCAMP6s::unc-54 3'UTR; Pofm-1::RFP]</i>                                 | This study |
| TWN2898 | <i>Caenorhabditis elegans</i>  | <i>unc-17(e245); yphIs3[Pmyo-2::GCAMP6s::unc-54 3'UTR; Pofm-1::RFP]</i>                                 | This study |
| TWN2719 | <i>Caenorhabditis elegans</i>  | <i>unc-31(e928); yphIs3[Pmyo-2::GCAMP6s::unc-54 3'UTR; Pofm-1::RFP]</i>                                 | This study |
| TWN2771 | <i>Caenorhabditis elegans</i>  | <i>unc-13(s69); yphIs3[Pmyo-2::GCAMP6s::unc-54 3'UTR; Pofm-1::RFP]</i>                                  | This study |
| TWN2971 | <i>Caenorhabditis elegans</i>  | <i>yphEx285[Posm-6::TeTx::mCherry; Pofm-1::RFP]; yphIs3[Pmyo-2::GCAMP6s::unc-54 3'UTR; Pofm-1::RFP]</i> | This study |
| SJ4103  | <i>Caenorhabditis elegans</i>  | <i>zcls14[Pmyo-3::mitoGFP]</i>                                                                          | CGC        |
| TWN3020 | <i>Caenorhabditis elegans</i>  | <i>yphEx286[Pmyo-2::GCAMP6s::unc-54 3'UTR; Pofm-1::RFP]</i>                                             | This study |
| RS2333  | <i>Pristionchus pacificus</i>  | wild type                                                                                               | <b>(3)</b> |
| Fu1098  | <i>Pristionchus pacificus</i>  | <i>dyf-2(tu1098)</i>                                                                                    | <b>(3)</b> |
| Fu1129  | <i>Pristionchus pacificus</i>  | <i>osm-1(tu1129)</i>                                                                                    | <b>(3)</b> |
|         | <i>Pristionchus pacificus</i>  | <i>osm-3(tu1190); klp-20(tu1131)</i>                                                                    | <b>(3)</b> |
| TWN1898 | <i>Caenorhabditis briggsae</i> | wild type                                                                                               | This study |
| PHw2    | <i>Diploscapter coronatus</i>  | wild type                                                                                               | This study |
| TWN1998 | <i>Oscheius myriophilus</i>    | wild type                                                                                               | This study |
| TWN1422 | <i>Rhabditis colombiana</i>    | wild type                                                                                               | This study |
| TWN1327 | <i>Oscheius tipulae</i>        | wild type                                                                                               | This study |

|           |                                |           |                                                                    |
|-----------|--------------------------------|-----------|--------------------------------------------------------------------|
| TWN301    | <i>Rhabditis rainai</i>        | wild type | This study                                                         |
| TWN1985   | <i>Pristionchus pacificus</i>  | wild type | This study                                                         |
| TWN1840   | <i>Panagrellus redivivus</i>   | wild type | This study                                                         |
| TWN1305   | <i>Acrobeloides apiculatus</i> | wild type | This study                                                         |
| Northw1   | <i>Cephalobus cubaensis</i>    | wild type | This study                                                         |
| TWN1306   | <i>Mesorhabditis sp.</i>       | wild type | This study                                                         |
| TWN1451   | <i>Pelodera teres</i>          | wild type | This study                                                         |
| BCRC36436 | <i>Pleurotus sapidus</i>       | wild type | Bioresource<br>Collection<br>and<br>Research<br>Center<br>(Taiwan) |
| BCRC36432 | <i>Pleurotus djamor</i>        | wild type | Bioresource<br>Collection<br>and<br>Research<br>Center<br>(Taiwan) |
| BCRC36222 | <i>Pleurotus flabellatus</i>   | wild type | Bioresource<br>Collection<br>and<br>Research<br>Center<br>(Taiwan) |
| BCRC36217 | <i>Pleurotus dryinus</i>       | wild type | Bioresource<br>Collection<br>and<br>Research<br>Center<br>(Taiwan) |



|           |                              |           |                                                                    |
|-----------|------------------------------|-----------|--------------------------------------------------------------------|
| BCRC36211 | <i>Pleurotus calypratus</i>  | wild type | Bioresource<br>Collection<br>and<br>Research<br>Center<br>(Taiwan) |
| BCRC36210 | <i>Pleurotus floridanus</i>  | wild type | Bioresource<br>Collection<br>and<br>Research<br>Center<br>(Taiwan) |
| BCRC36230 | <i>Pleurotus pulmonarius</i> | wild type | Bioresource<br>Collection<br>and<br>Research<br>Center<br>(Taiwan) |
| BCRC36237 | <i>Pleurotus sajor-caju</i>  | wild type | Bioresource<br>Collection<br>and<br>Research<br>Center<br>(Taiwan) |
| BCRC36069 | <i>Pleurotus ostreatus</i>   | wild type | Bioresource<br>Collection<br>and<br>Research<br>Center<br>(Taiwan) |

|           |                                      |           |                                                     |
|-----------|--------------------------------------|-----------|-----------------------------------------------------|
| BCRC36940 | <i>Pleurotus nebrodensis</i>         | wild type | Bioresource Collection and Research Center (Taiwan) |
| BCRC36163 | <i>Pleurotus eryngii</i>             | wild type | Bioresource Collection and Research Center (Taiwan) |
| BCRC36214 | <i>Pleurotus fuscus var. ferulae</i> | wild type | Bioresource Collection and Research Center (Taiwan) |
| BCRC36226 | <i>Pleurotus subareolatus</i>        | wild type | Bioresource Collection and Research Center (Taiwan) |
| BCRC36924 | <i>Pleurotus citrinopileatus</i>     | wild type | Bioresource Collection and Research Center (Taiwan) |

|           |                              |           |                                                                    |
|-----------|------------------------------|-----------|--------------------------------------------------------------------|
| BCRC36171 | <i>Pleurotus cystidiosus</i> | wild type | Bioresource<br>Collection<br>and<br>Research<br>Center<br>(Taiwan) |
| AT8       | <i>Coprinopsis cinerea</i>   | wild type | Dr. Ursula<br>Kues's lab                                           |

118

119 **SI References:**

- 120 1. Collet J, Spike CA, Lundquist EA, Shaw JE, & Herman RK (1998) Analysis of *osm-6*, a  
121 gene that affects sensory cilium structure and sensory neuron function in  
122 *Caenorhabditis elegans*. *Genetics* 148(1):187-200.
- 123 2. Fang-Yen C, Gabel CV, Samuel AD, Bargmann CI, & Avery L (2012) Laser  
124 microsurgery in *Caenorhabditis elegans*. *Methods in cell biology*, (Elsevier), Vol 107,  
125 pp 177-206.
- 126 3. Moreno E, *et al.* (2017) Regulation of hyperoxia-induced social behaviour in  
127 *Pristionchus pacificus* nematodes requires a novel cilia-mediated environmental  
128 input. *Scientific Reports* 7(1).

129
